# Programmatic modeling for biological systems

*Alexander L.R. Lubbock*<sup>1,2</sup>, *Carlos F. Lopez*<sup>1,2,3,\*</sup>

<sup>1</sup> Department of Biochemistry, Vanderbilt University, Nashville, Tennessee 37212, United States of America

<sup>2</sup> Vanderbilt-Ingram Cancer Center, Vanderbilt University, Nashville Tennessee 37212, United States of America

<sup>3</sup> Department of Biomedical Informatics, Vanderbilt University, Nashville, Tennessee 37212, United States of America

\* To whom correspondence should be addressed: [c.lopez@vanderbilt.edu](mailto:c.lopez@vanderbilt.edu)

## Abstract

Computational modeling has become an established technique to encode mathematical representations of cellular processes and gain mechanistic insights that drive testable predictions. These models are often constructed using graphical user interfaces or domain-specific languages, with SBML used for interchange. Models are typically simulated, calibrated, and analyzed either within a single application, or using import and export from various tools. Here, we describe a programmatic modeling paradigm, in which modeling is augmented with best practices from software engineering. We focus on Python - a popular, user-friendly programming language with a large scientific package ecosystem. Models themselves can be encoded as programs, adding benefits such as modularity, testing, and automated documentation generators while still being exportable to SBML. Automated version control and testing ensures models and their modules have expected properties and behavior. Programmatic modeling is a key technology to enable collaborative model development and enhance dissemination, transparency, and reproducibility.

## Highlights

- Programmatic modeling combines computational modeling with software engineering best practices.
- An executable model enables users to leverage all available resources from the language.
- Community benefits include improved collaboration, reusability, and reproducibility.
- Python has multiple modeling frameworks with a broad, active scientific ecosystem.

## Introduction

Mathematical modeling of cellular processes for mechanism exploration has now become commonplace using various techniques [1–5], but challenges remain as to how models should be built, calibrated, analyzed and interpreted to extract much-needed mechanistic knowledge from experimental data. Historically, methods and techniques from other fields have been directly imported to systems biology with varying success. For example, early interpretations of cellular processes as circuits provided insights about basic regulatory motifs that could explain cellular behaviors [6]. Similarly, techniques from chemistry, physics, and various engineering disciplines have been used to model cellular processes [7,8], but due to the spatiotemporal complexity of cellular processes, from femtosecond/nanometer electron transfer reactions to years and meter scales in tumor growth, no established paradigm has emerged to capture the full complexity of cellular processes. Multiple tools have been developed to achieve specific modeling tasks. For example, COPASI [5], RuleMonkey [9], Simmune [10], and StochSS [11] all provide graphical user interfaces that cater to non-expert modelers wishing to encode mechanistic representations of biological processes. More abstract approaches such as BioNetGen [12], Kappa [13], and CobraPy [14] employ a domain-specific language (DSL) to describe and simulate models. However, most tools are self-contained platforms with a small set of included methods and analyses, limiting access to other standalone simulation tools such as StochKit [4], SciML tools [15], URDME [16], Smoldyn [17]. Similarly, optimization techniques ranging from vector-based optimization methods [18,19] to probabilistic-based methods [20\*,21] exist in yet another isolated domain. Therefore, the current modeling and simulation ecosystem is compartmentalized and fractured, and thus, unification and intercompatibility efforts are sorely needed.

Valuable efforts toward unification have been put forth to create standards for model instantiation, simulation, analysis and dissemination [22,23\*\*,24–26]. Of these, Systems Biology Markup Language (SBML) is perhaps the most successful to date. However, mathematical modeling for cell biology remains challenging to scale - both vertically (larger, more complex models) and horizontally (more active collaborators). While mathematical tools are the obvious way forward to describe cellular processes, the complexity challenge results in a knowledge base that is highly domain specific, with some notable exceptions [27\*].

A novel, more flexible approach to encode knowledge about biological processes as computer programs is slowly emerging and gaining momentum [3,28,29]. In this approach, biological models are no longer static documents, but computer code that

aggregates community knowledge and opens doors toward crowd-driven mathematical models of biological processes. Although computer languages like Lisp [30] and proprietary packages such as MATLAB have been used toward this goal, we believe Python provides the largest ecosystem, myriad learning resources, and large applicable base to unify modeling practices in the field. Adopting a programmatic modeling paradigm for systems biology automatically accrues decades of computer science practices including structured documentation, integrated development environments (IDEs), (model) version control, code-sharing platforms, code testing frameworks, and importantly, literate programming/computational notebook dissemination. Here, we review the recent developments in programming-based approaches for systems biology. The structure of the manuscript is motivated by the model specification, simulation, calibration, analysis, and visualization paradigm/pipeline, commonly practiced in systems biology. Throughout, we note how this approach could be supplemented and improved by incorporating best practices from software engineering (Figure 1).

## Model specification

Traditionally, encoding a model of biochemical reactions would require the user to write each equation by hand, encode these into a solver, and run the simulations [31]. Although this is still common practice for smaller model systems, these lists of equations often lead to a model dead-end as the biological context is completely lost in the mathematical representation, which hinders model reuse. Reaction-based modeling formats add one layer of abstraction where the user instead writes chemical reactions of the form  $A + B \leftrightarrow C$  in a program-specific notation and the computer parses this information into a mathematical representation [32]. These DSLs can operate either through a GUI that generates the code in the background, or directly through a text editor. For example, Antimony [32] requires manual enumeration of every species and reaction explicitly. However, signaling pathways often comprise a large number of molecular complexes, which can assemble in multiple orders, leading to a large number of reactions and intermediate species during complex assembly and degradation. Therefore, traditional approaches become unwieldy as model systems become larger, learning to model dead-ends. Another level of abstraction is presented by rule-based modeling formalisms whereby *reaction rules* rather than explicit reactions (or equations) are used to encode the system [3,12,13]. A reaction rule is a template for reaction patterns to be enumerated and instantiated recursively, starting from a defined list of initial species, thereby saving the user time and reducing error-prone repetition. In rule-based approaches, the reaction center (the relevant molecular

components for a given reaction) is separated from the context (attached molecular components which have minimal or no effect on the reaction). These approaches often require a pre-processing step to generate the network of nodes (chemical species) and edges (chemical reactions) from the initial pool of chemical species and a set of reaction rules. However, network-free methodologies have been proposed to bypass the network generation step [33].

Model specification can also be embedded into General Purpose Programming Languages (GPPL) to provide a more powerful approach to biological modeling. In the programmatic modeling paradigm, the model is encoded as an executable piece of code, thereby offering all the advantages of a full-fledged computer programming language (Figure 2). Modularity, in which a model can be split into smaller, reusable code objects, is perhaps the most useful aspect for cell biology modeling. For example, PySB currently includes a library of 25 macros (small modules or functions) that encode reaction patterns commonly found in biology such as catalytic activation, molecule-molecule inhibition, or complex oligomerization. From a user perspective, GPPLs have greater integration with IDEs than DSLs, thus allowing syntax highlighting and checking, and navigation between functions. The model is also inspectable at runtime, allowing searching and filtering of model components. For example, a user could check whether certain species or reactions are present before simulation commences. Currently, the most used modeling frameworks using the programmatic modeling paradigm in Python are PySB [3], written in and using Python, and Tellurium [29], which is written in Python but uses Antimony [32], a DSL with function support, for model specification.

## **Model simulation**

Model simulation involves numerically solving the model equations to obtain trajectories for dynamically controlled species. Concentrations or molecule counts of chemical species in the model are the most commonly simulated quantities. Integration of systems of ordinary differential equations (ODEs) for deterministic simulations is the most common model simulation approach. Many ODE integrators are available and the best choice depends on model stiffness, desired integrator tolerances, and other requirements. In Python, a family of integrators is available through SciPy [34\*\*] including VODE and LSODA, but many other solvers have been proposed. Other commonly used solver suites include StochKit (Stochastic Simulation Algorithm) [4,35], BioNetGen (CVODE, SSA, tau-leaping algorithm, partition-leaping algorithm) [12], cupSODA (GPU ODE) [36], GPU\_SSA (GPU SSA) [37], and Libroadrunner (CVODE,

SSA) [38]. Within the Python ecosystem, PySB provides a simulation class that enables users to use many of these simulation tools or to connect new tools as needed. In addition, users of other Python-based tools such as Tellurium can also take advantage of these resources.

## Model calibration

Model calibration is the process of adjusting model parameters to match experimental data, also known as parameter estimation/optimization when applied to parametric models. The most common form of model calibration involves a process of running many simulations (thousands to millions or more) and checking the distance between model and experimental data error using an objective function, which gives a measure of the model's simulation "error" versus experiment; for a review see [39]. Since dynamic data for signaling models are hard to come by, the modeler often only has data for a few species, and thus model calibration often leaves a model underdetermined - multiple parameter sets fit the data equally well [40]. The concept of parameter "sloppiness" states that only a few "stiff" combinations of parameters are important in determining model outcomes, and others are "sloppy" and have little effect. Thus, an undetermined model can still be useful in predicting biological properties [41]. However, the interpretation of large, underdetermined models in the context of limited data is still up for debate. Lessons from e.g. hydrology and climate modeling have been highly influential toward addressing these issues [20\*,42,43].

The landscape of model parameters is often envisioned as a multidimensional surface with "height" representing the objective function, where the (ideally global) minimum or minima (representing the best fit(s)) must be found. SciPy [34\*\*], for example, includes gradient descent and simplex-based methods. However, the curse of dimensionality means that local optimization can give far-from-globally optimal results as the number of model parameters increases. Finding the global minimum of a multivariate nonlinear model is NP-hard [44], however several methods can make statistically good approximations. Markov Chain Monte Carlo sampling methods are among the most popular algorithms [45]. General purpose optimization toolkits for Python include SciPy.optimize [34\*\*] and Pyomo [46]. We have found that DEAP [19] provides excellent support for PSO and genetic algorithm-based optimization.

Given the dearth of data available for biological model calibration, conditional probability (Bayesian) approaches are gaining traction. These approaches provide a probabilistic interpretation of model parameters [47], including uncertainty

quantification, at the cost of increased computer time. However, new GPU-based integrators mitigate this problem. Excellent tools for Bayesian parameter inference include PyDREAM (which can readily take PySB models) [20\*], PyBioNetFit [48\*], PyPESTO [49], PyMC3 [50], and PySTAN [51], although popular data-science tools such as TensorFlow [52] and PyTorch [53] also provide Bayesian inference capabilities. ABC-SysBio [54] provides a hybrid solution to the computation problem but still within a Bayesian context.

## **Model analysis and visualization**

Model analysis and visualization is likely the least developed area in systems biology as no clear standards have been proposed. In general, modelers explore the chemical species concentration trajectories in their model to infer mechanistic behaviors and properties. Exploration of biochemical flux through reactions is highly challenging with some notable attempts toward this goal in the literature [7,47], but much work is still needed. For visualization, perhaps the most useful tool in Python is matplotlib [55], which provides flexible graphing capabilities. Other Python tools include Seaborn (<https://seaborn.pydata.org/>), Plotly [56], and Mayavi [57]. Network visualization is perhaps the other major area of model analysis that is addressed in various ways in Python. For example, PyVIPR [58\*] is a visualization tool built on Cytoscape.js [59] for rule- and reaction-based models which animates model dynamics over time, overlaid on a graph. MASSPy [60] also provides some visualization capabilities for metabolic models. We note, however, that excellent tools for graph manipulation in Python exist, such as NetworkX [61].

## **Model sharing and modification**

Perhaps the most appealing benefit for the systems biology community from program-based paradigm is the use of literate programming for model and results dissemination. Introduced by Donald Knuth, literate programming is a paradigm whereby the code and the document coexist in an interactive format [62]. Jupyter Notebook, a popular format, has been described as “data scientists’ computational notebook of choice” [63]. Jupyter Notebooks allow analyses to be run in a web browser, checked into version control, and include documentation alongside analyses, in turn improving transparency and reproducibility. We believe that Jupyter notebooks are a highly desirable step forward in systems biology as it greatly contributes to model

transparency, revision, and dissemination, and should be included in paper submissions where computational simulation and analysis are involved.

Programmatic models' code can be managed using existing version control tools. Git has emerged as the *de facto* standard for version control, providing powerful capabilities for decentralized editing, branching, and merging, with online platforms such as GitHub adding a collaborative interface for change management, commenting, and other functions. In PySB, models are Python programs, and so can be imported like other Python modules and extended or modified. The code can be inspected, for example the model can be searched for species or reactions using pattern matching. Tellurium's antimony language has an import function, but previous model definitions are currently not programmatically searchable or modifiable.

Good documentation can be vital to ensure model reproducibility and interpretability by others. Sphinx ([sphinx-doc.org](http://sphinx-doc.org)) is a *de facto* documentation standard for Python code, which allows code comments to be compiled into multiple formats including website (HTML) and PDF. The former can be combined with continuous integration, for always up-to-date documentation ([readthedocs.io](http://readthedocs.io)).

## **Model checking and testing**

Complex biochemical models present challenges in both ensuring they are correctly encoded, and ensuring their dynamics meet a given specification. In software engineering, it has become common practice to build an accompanying test suite while developing code, which runs the code under scrutiny to test that works as expected. Subtle errors can be introduced as models grow larger. In our opinion, the field should establish minimum standards to ensure software is runnable, reproducible, and meets basic quality standards [64]. In the context of models-as-programs, unit and integration tests can be borrowed from software engineering to ensure code correctness. Unit tests refers to code which checks the functionality of other, minimal units of code; integration tests check that units work as expected when combined. Python has several frameworks for testing, PyTests is a popular option with a plugin for Jupyter Notebooks [65]. PySB introduces a framework for testing static properties of rule-based models after network generation; for example, checking that certain species are produced by the reaction network, or that certain reactions are present. Using continuous integration (CI), these tests can be run automatically when changes are made and checked into version control, and/or on a regular basis. Running tests regularly is recommended because, even if a model itself does not change, changes to

software dependencies could lead to unexpected errors. The importance of this is emphasized by a recent review, which found a majority of Jupyter Notebooks were not automatically reproducible, often due to dependency errors [66\*\*]. For open-source models, these tests can be run for free using services such as Github Actions, Travis, and Circle CI. Finally, we recommend containerization technologies such as Docker [67] and Singularity [68], which bundle model and software dependencies together in a self-contained environment, further aiding reproducibility and cross-platform compatibility.

## **Conclusions**

Python has recently turned 30 years old and is now one of the most popular programming languages in the world. There are many reasons for its success, but a key insight of its creator is that code is read much more often than it's written [69]. The same principle applies to models, which emphasizes the importance of clear documentation, transparency of approach, and the separation of model specification from simulation and downstream analysis code. These efforts are central to improving reproducibility, code maintenance, and model extensions, by original authors and third parties.

For beginners interested in modeling cell signaling, we recommend either the PySB or Tellurium frameworks, both of which have high quality documentation and active communities for support. We expect the Python modeling ecosystem will continue to grow, and efforts for framework and package interoperability to increase.

## **Acknowledgements**

Funding was provided by the National Science Foundation (1411482 and 1942255 to C.F.L.) and the National Cancer Institute (U01CA215845 to C.F.L.).



| Tool or service                     | Usage terms   | Notes                                                                  |
|-------------------------------------|---------------|------------------------------------------------------------------------|
| <b>Frameworks</b>                   |               |                                                                        |
| PySB [3]                            | BSD           | Bespoke Python object-based model format, multiple simulation backends |
| Tellurium [29]                      | Apache        | Bespoke DSL (Antimony), ODE and SSA simulation backends                |
| PySCeS [70]                         | BSD           | Bespoke DSL, ODE simulation backend                                    |
| ScrumPy [71]                        | GPL           | Metabolic modeling                                                     |
| CobraPy [14]                        | GPL           | Metabolic modeling                                                     |
| <b>Testing</b>                      |               |                                                                        |
| PyTest                              | MIT           | Testing framework; pytest.org                                          |
| GitHub Actions                      | Free* service | Continuous Integration; github.com/features/actions                    |
| Circle CI                           | Free* service | Continuous Integration; circleci.com                                   |
| <b>Calibration</b>                  |               |                                                                        |
| PyBioNetFit [48*]                   | BSD           | BNGL and SBML models                                                   |
| PyPESTO [49]                        | BSD           | SBML and PEST support                                                  |
| PyDREAM [20*]                       | GPL           | PySB interface                                                         |
| <b>Analysis &amp; Visualization</b> |               |                                                                        |
| Matplotlib                          | PSF           | Plotting library; matplotlib.org                                       |
| Jupyter Notebooks                   | BSD           | Computational notebooks; jupyter-notebook.readthedocs.io               |
| PyVIPR [58*]                        | MIT           | PySB, Tellurium interfaces                                             |
| <b>Sharing and modification</b>     |               |                                                                        |
| GitHub                              | Free* service | Code hosting and collaboration suite; github.com                       |

|             |                  |                                                                 |
|-------------|------------------|-----------------------------------------------------------------|
| Sphinx      | BSD              | Documentation framework; sphinx-doc.org                         |
| Readthedocs | Free*<br>service | Automated documentation compiler and hosting;<br>readthedocs.io |

Table 1: List of key frameworks, tools, and services for programmatic modeling in Python. BSD, MIT, and PSF are permissive software licenses. GPL is a “copyleft” software license.  
\*Free for open-source projects.

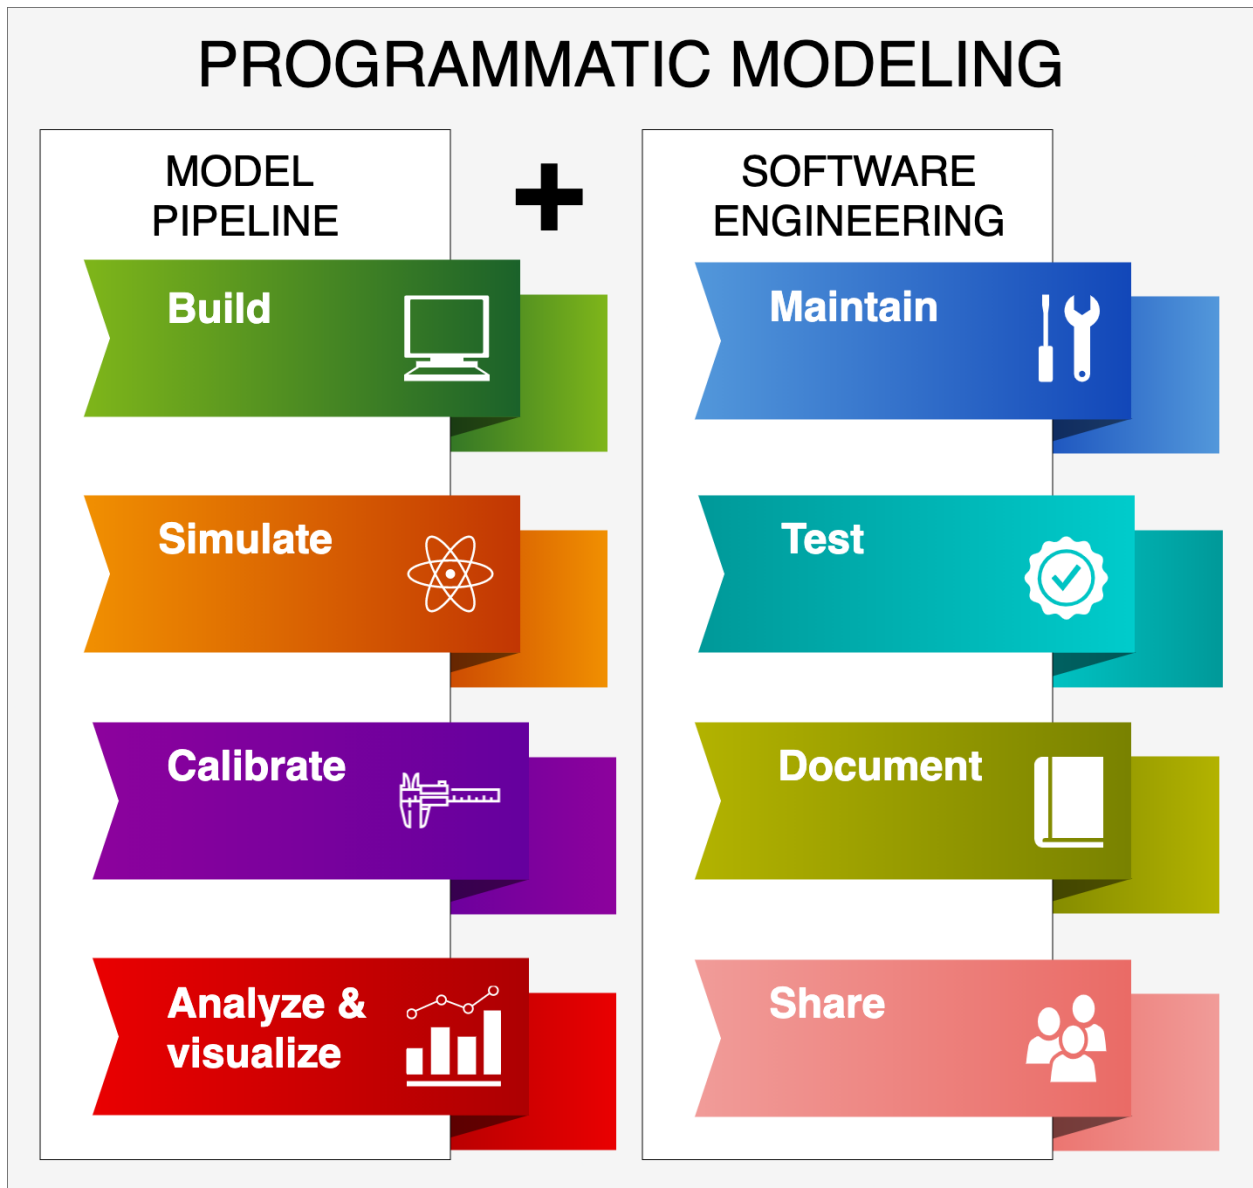

Figure 1: The traditional modeling paradigm in systems biology entails model building, simulation, calibration, and analysis (left column), which is carried out with myriad tools and practices. Software engineering practices can add much needed structure to the practice through maintenance, testing, documentation and sharing paradigms (right column), vetted by a the software community.

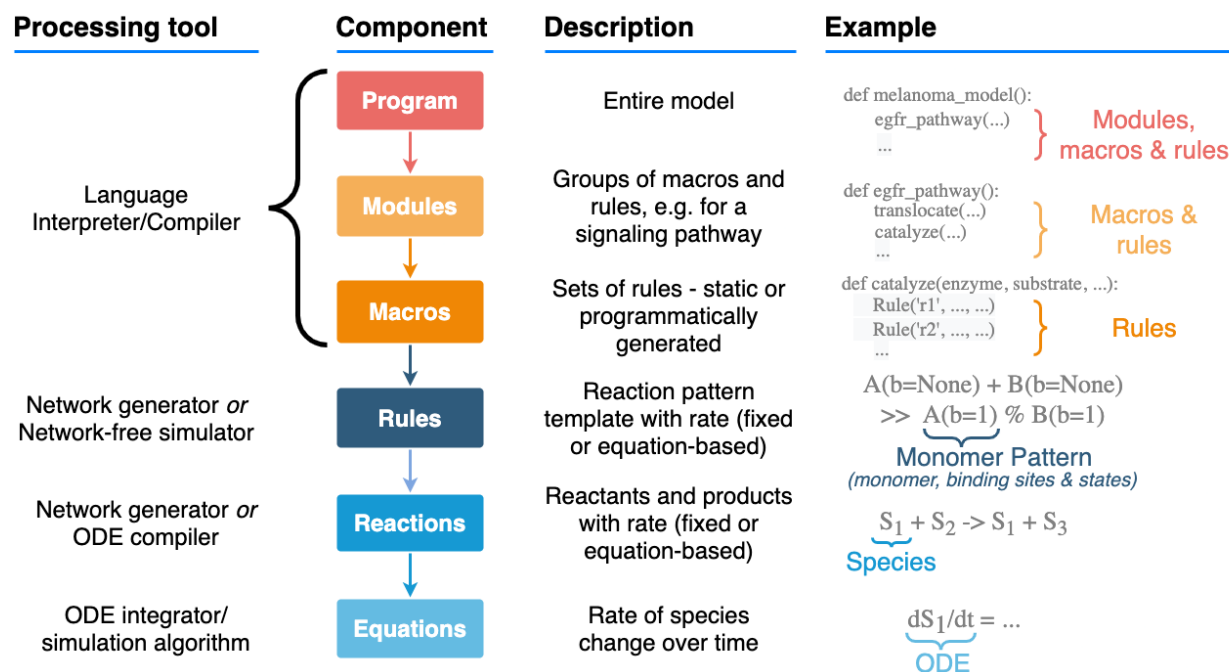

Figure 2: Levels of abstraction in programmatic modeling. Models are composed of modules and macros, which are handled by the programming language interpreter/compiler; rules encode sets of reactions using structured pattern templates; reactions specify biochemical species' transformations; and finally equations are handled by an ODE integrator or simulation algorithm directly.

## References

1. Albert R, Thakar J: **Boolean modeling: a logic-based dynamic approach for understanding signaling and regulatory networks and for making useful predictions.** *Wiley Interdiscip Rev Syst Biol Med* 2014, **6**:353–369.
2. Ghaffarizadeh A, Heiland R, Friedman SH, Mumenthaler SM, Macklin P: **PhysiCell: An open source physics-based cell simulator for 3-D multicellular systems.** *PLOS Comput Biol* 2018, **14**:e1005991.
3. Lopez CF, Muhlich JL, Bachman JA, Sorger PK: **Programming biological models in Python using PySB.** *Mol Syst Biol* 2013, **9**.
4. Sanft KR, Wu S, Roh M, Fu J, Lim RK, Petzold LR: **StochKit2: software for discrete stochastic simulation of biochemical systems with events.** *Bioinformatics* 2011, **27**:2457–2458.
5. Hoops S, Sahle S, Gauges R, Lee C, Pahle J, Simus N, Singhal M, Xu L, Mendes P, Kummer U: **COPASI—a COMplex PATHway Simulator.** *Bioinformatics* 2006, **22**:3067–3074.
6. Tyson JJ: **Modeling the cell division cycle: cdc2 and cyclin interactions.** *Proc Natl Acad Sci* 1991, **88**:7328–7332.
7. Mallela A, Nariya MK, Deeds EJ: **Crosstalk and ultrasensitivity in protein degradation pathways.** *PLOS Comput Biol* 2020, **16**:e1008492.
8. Lander AD, Nie Q, Sanchez-Tapia C, Simonyan A, Wan FYM: **Regulatory feedback on receptor and non-receptor synthesis for robust signaling.** *Dev Dyn Off Publ Am Assoc Anat* 2020, **249**:383–409.
9. Colvin J, Monine MI, Gutenkunst RN, Hlavacek WS, Von Hoff DD, Posner RG: **RuleMonkey: software for stochastic simulation of rule-based models.** *BMC Bioinformatics* 2010, **11**:404.
10. Angermann BR, Klauschen F, Garcia AD, Prustel T, Zhang F, Germain RN, Meier-Schellersheim M: **Computational modeling of cellular signaling processes embedded into dynamic spatial contexts.** *Nat Methods* 2012, **9**:283–289.
11. Drawert B, Hellander A, Bales B, Banerjee D, Bellesia G, Jr BJD, Douglas G, Gu M, Gupta A, Hellander S, et al.: **Stochastic Simulation Service: Bridging the Gap between the Computational Expert and the Biologist.** *PLOS Comput Biol* 2016, **12**:e1005220.
12. Harris LA, Hogg JS, Tapia J-J, Sekar JAP, Gupta S, Korsunsky I, Arora A, Barua D, Sheehan RP, Faeder JR: **BioNetGen 2.2: advances in rule-based modeling.** *Bioinformatics* 2016, **32**:3366–3368.
13. Boutillier P, Maasha M, Li X, Medina-Abarca HF, Krivine J, Feret J, Cristescu I, Forbes AG, Fontana W: **The Kappa platform for rule-based modeling.** *Bioinformatics* 2018, **34**:i583–i592.
14. Ebrahim A, Lerman JA, Palsson BO, Hyduke DR: **COBRApy: CONSTRAINTS-BASED RECONSTRUCTION AND ANALYSIS FOR PYTHON.** *BMC Syst Biol* 2013, **7**:74.
15. Rackauckas C, Nie Q: **DifferentialEquations.jl – A Performant and Feature-Rich Ecosystem for Solving Differential Equations in Julia.** *J Open Res Softw* 2017, **5**:15.
16. Drawert B, Trogon M, Toor S, Petzold L, Hellander A: **MOLNs: A CLOUD PLATFORM FOR INTERACTIVE, REPRODUCIBLE, AND SCALABLE SPATIAL STOCHASTIC COMPUTATIONAL EXPERIMENTS IN SYSTEMS BIOLOGY USING PyURDME.** *SIAM J Sci Comput Publ Soc Ind Appl Math* 2016, **38**:C179–C202.
17. Andrews SS: **Smoldyn: particle-based simulation with rule-based modeling, improved molecular interaction and a library interface.** *Bioinforma Oxf Engl* 2017, **33**:710–717.
18. Kennedy J, Eberhart R: **Particle swarm optimization.** In *Proceedings of ICNN'95 - International Conference on Neural Networks*. . 1995:1942–1948 vol.4.
19. Fortin F-A, De Rainville F-M, Gardner M-AG, Parizeau M, Gagné C: **DEAP: evolutionary**

**algorithms made easy.** *J Mach Learn Res* 2012, **13**:2171–2175.

20. \* Shockley EM, Vrugt JA, Lopez CF: **PyDREAM: high-dimensional parameter inference for biological models in python.** *Bioinformatics* 2018, **34**:695–697.

Shockley et al. present a Python implementation of the DREAM algorithm, an efficient Monte Carlo method for parameter estimation, with PySB compatibility.

21. Feroz F, Hobson MP, Bridges M: **MultiNest: an efficient and robust Bayesian inference tool for cosmology and particle physics.** *Mon Not R Astron Soc* 2009, **398**:1601–1614.
22. Keating SM, Waltemath D, König M, Zhang F, Dräger A, Chaouiya C, Bergmann FT, Finney A, Gillespie CS, Helikar T, et al.: **SBML Level 3: an extensible format for the exchange and reuse of biological models.** *Mol Syst Biol* 2020, **16**:e9110.
23. \*\* Zhang F, Smith LP, Blinov ML, Faeder J, Hlavacek WS, Juan Tapia J, Keating SM, Rodriguez N, Dräger A, Harris LA, et al.: **Systems biology markup language (SBML) level 3 package: multistate, multicomponent and multicompartment species, version 1, release 2.** *J Integr Bioinforma* 2020, **17**.

SBML Multi is a standard to include multistate, multicomponent species within SBML, bringing closer compatibility with rules-based modeling platforms.

24. Clerx M, Cooling MT, Cooper J, Garny A, Moyle K, Nickerson DP, Nielsen PMF, Sorby H: **CelIML 2.0.** *J Integr Bioinforma* 2020, **17**.
25. Agapito G, Pastrello C, Guzzi PH, Jurisica I, Cannataro M: **BioPAX-Parser: parsing and enrichment analysis of BioPAX pathways.** *Bioinforma Oxf Engl* 2020, **36**:4377–4378.
26. Bergmann FT, Cooper J, König M, Moraru I, Nickerson D, Le Novère N, Olivier BG, Sahle S, Smith L, Waltemath D: **Simulation Experiment Description Markup Language (SEDM-ML) Level 1 Version 3 (L1V3).** *J Integr Bioinforma* 2018, **15**.
27. \* Szigeti B, Roth YD, Sekar JAP, Goldberg AP, Pochiraju SC, Karr JR: **A blueprint for human whole-cell modeling.** *Curr Opin Syst Biol* 2018, **7**:8–15.

Szigeti et al. propose a roadmap towards whole-cell dynamical models, including discussion on technology and standards development.

28. Gyori BM, Bachman JA, Subramanian K, Muhlich JL, Galescu L, Sorger PK: **From word models to executable models of signaling networks using automated assembly.** *Mol Syst Biol* 2017, **13**:954.
29. Choi K, Medley JK, Cannistra C, König M, Smith L, Stocking K, Sauro HM: **Tellurium: A Python Based Modeling and Reproducibility Platform for Systems Biology.** *bioRxiv* 2016, doi:10.1101/054601.
30. Mallavarapu A, Thomson M, Ullian B, Gunawardena J: **Programming with models: modularity and abstraction provide powerful capabilities for systems biology.** *J R Soc Interface* 2009, **6**:257–270.
31. Chen WW, Schoeberl B, Jasper PJ, Niepel M, Nielsen UB, Lauffenburger DA, Sorger PK: **Input–output behavior of ErbB signaling pathways as revealed by a mass action model trained against dynamic data.** *Mol Syst Biol* 2009, **5**.
32. Smith LP, Bergmann FT, Chandran D, Sauro HM: **Antimony: a modular model definition language.** *Bioinformatics* 2009, **25**:2452–2454.
33. Sneddon MW, Faeder JR, Emonet T: **Efficient modeling, simulation and coarse-graining of biological complexity with NFsim.** *Nat Methods* 2011, **8**:177–183.
34. \* Virtanen P, Gommers R, Oliphant TE, Haberland M, Reddy T, Cournapeau D, Burovski E,

Peterson P, Weckesser W, Bright J, et al.: **SciPy 1.0: fundamental algorithms for scientific computing in Python**. *Nat Methods* 2020, **17**:261–272.

SciPy 1.0 is an open-source library at the core of the scientific Python ecosystem, including optimization, integration, interpolation, matrix algebra and much more.

35. Gillespie DT: **Stochastic Simulation of Chemical Kinetics**. *Annu Rev Phys Chem* 2007, **58**:35–55.
36. Harris LA, Nobile MS, Pino JC, Lubbock ALR, Besozzi D, Mauri G, Cazzaniga P, Lopez CF: **GPU-powered model analysis with PySB/cupSODA**. *Bioinformatics* 2017, **33**:3492–3494.
37. Pino JC, Prugger M, Lubbock ALR, Harris LA, Lopez CF: **Accelerated Simulations of Chemical Reaction Systems using the Stochastic Simulation Algorithm on GPUs**. *bioRxiv* 2020, doi:10.1101/2020.02.14.948612.
38. Somogyi ET, Bouteiller J-M, Glazier JA, König M, Medley JK, Swat MH, Sauro HM: **libRoadRunner: a high performance SBML simulation and analysis library**. *Bioinforma Oxf Engl* 2015, **31**:3315–3321.
39. Mitra ED, Hlavacek WS: **Parameter Estimation and Uncertainty Quantification for Systems Biology Models**. *Curr Opin Syst Biol* 2019, **18**:9–18.
40. Daniels BC, Chen Y-J, Sethna JP, Gutenkunst RN, Myers CR: **Sloppiness, robustness, and evolvability in systems biology**. *Curr Opin Biotechnol* 2008, **19**:389–395.
41. Gutenkunst RN, Waterfall JJ, Casey FP, Brown KS, Myers CR, Sethna JP: **Universally Sloppy Parameter Sensitivities in Systems Biology Models**. *PLoS Comput Biol* 2007, **3**:e189.
42. Kochen MA, Lopez CF: **A Probabilistic Approach to Explore Signal Execution Mechanisms With Limited Experimental Data**. *Front Genet* 2020, **11**.
43. Vrugt JA, ter Braak CJF, Clark MP, Hyman JM, Robinson BA: **Treatment of input uncertainty in hydrologic modeling: Doing hydrology backward with Markov chain Monte Carlo simulation**. *Water Resour Res* 2008, **44**:n/a-n/a.
44. Floudas CA, Pardalos PM: *State of the Art in Global Optimization: Computational Methods and Applications*. Springer Science & Business Media; 2013.
45. Valderrama-Bahamóndez GI, Fröhlich H: **MCMC Techniques for Parameter Estimation of ODE Based Models in Systems Biology**. *Front Appl Math Stat* 2019, **5**.
46. Hart WE: **Python Optimization Modeling Objects (Pyomo)**. In *Operations Research and Cyber-Infrastructure*. Edited by Chinneck JW, Kristjansson B, Saltzman MJ. Springer US; 2009:3–19.
47. Shockley EM, Rouzer CA, Marnett LJ, Deeds EJ, Lopez CF: **Signal integration and information transfer in an allosterically regulated network**. *Npj Syst Biol Appl* 2019, **5**:1–9.
48. \* Mitra ED, Suderman R, Colvin J, Ionkov A, Hu A, Sauro HM, Posner RG, Hlavacek WS: **PyBioNetFit and the Biological Property Specification Language**. *iScience* 2019, **19**:1012–1036.

PyBioNetFit is a tool for model parameter estimation, uncertainty characterization, and agreement with experimental data.

49. Schmiester L, Weindl D, Hasenauer J: **Efficient gradient-based parameter estimation for dynamic models using qualitative data**. *bioRxiv* 2021, doi:10.1101/2021.02.06.430039.
50. Salvatier J, Wiecki TV, Fonnesbeck C: **Probabilistic programming in Python using PyMC3**. *PeerJ Comput Sci* 2016, **2**:e55.

51. Van Hoey S, van der Kwast J, Nopens I, Seuntjens P: **Python package for model SStructure ANalysis (pySTAN)**. 2013, **15**:EGU2013-10059.
52. Abadi M, Barham P, Chen J, Chen Z, Davis A, Dean J, Devin M, Ghemawat S, Irving G, Isard M, et al.: **TensorFlow: A System for Large-Scale Machine Learning**. 2016:265–283.
53. Paszke A, Gross S, Massa F, Lerer A, Bradbury J, Chanan G, Killeen T, Lin Z, Gimelshein N, Antiga L, et al.: **PyTorch: An Imperative Style, High-Performance Deep Learning Library**. 2019,
54. Liepe J, Barnes C, Cule E, Erguler K, Kirk P, Toni T, Stumpf MPH: **ABC-SysBio—approximate Bayesian computation in Python with GPU support**. *Bioinformatics* 2010, **26**:1797–1799.
55. Hunter JD: **Matplotlib: A 2D Graphics Environment**. *Comput Sci Eng* 2007, **9**:90–95.
56. Plotly Technologies Inc: **Collaborative data science**. 2015,
57. Ramachandran P, Varoquaux G: **Mayavi: 3D Visualization of Scientific Data**. *Comput Sci Eng* 2011, **13**:40–51.
58. \* Ortega OO, Lopez CF: **Interactive Multiresolution Visualization of Cellular Network Processes**. *iScience* 2020, **23**:100748.

PyVIPR is a visualization tool that aims to address network visualization problems with community detection algorithms.

59. Franz M, Lopes CT, Huck G, Dong Y, Sumer O, Bader GD: **Cytoscape.js: a graph theory library for visualisation and analysis**. *Bioinformatics* 2016, **32**:309–311.
60. Haiman ZB, Zielinski DC, Koike Y, Yurkovich JT, Palsson BO: **MASSpy: Building, simulating, and visualizing dynamic biological models in Python using mass action kinetics**. *PLOS Comput Biol* 2021, **17**:e1008208.
61. Hagberg A, Swart P, S Chult D: *Exploring network structure, dynamics, and function using networkx*. Los Alamos National Lab. (LANL), Los Alamos, NM (United States); 2008.
62. Knuth DE: **Literate Programming**. *Comput J* 1984, **27**:97–111.
63. Perkel JM: **Why Jupyter is data scientists' computational notebook of choice**. *Nature* 2018, **563**:145–146.
64. Lubbock ALR: **Accredit scientific software for sustainability**. *Nature* 2019, **572**:586–586.
65. Fangohr H, Fauske V, Kluyver T, Albert M, Laslett O, Cortés-Ortuño D, Beg M, Ragan-Kelly M: **Testing with Jupyter notebooks: Notebook VALidation (nbval) plug-in for pytest**. 2020,
66. \*\* Pimentel JF, Murta L, Braganholo V, Freire J: **A Large-Scale Study About Quality and Reproducibility of Jupyter Notebooks**. In *2019 IEEE/ACM 16th International Conference on Mining Software Repositories (MSR)*. . 2019:507–517.

Pimentel et al. conduct a large scale reproducibility analysis of Jupyter Notebooks. They identify common issues affecting reproducibility and suggest best practices.

67. Boettiger C: **An introduction to Docker for reproducible research**. *ACM SIGOPS Oper Syst Rev* 2015, **49**:71–79.
68. Kurtzer GM, Sochat V, Bauer MW: **Singularity: Scientific containers for mobility of compute**. *PLOS ONE* 2017, **12**:e0177459.
69. **PEP 8 -- Style Guide for Python Code**. *Python.org* [date unknown],
70. Olivier BG, Rohwer JM, Hofmeyr J-HS: **Modelling cellular systems with PySCeS**. *Bioinformatics* 2005, **21**:560–561.
71. Poolman MG: **ScrumPy: metabolic modelling with Python**. *Syst Biol* 2006, **153**:375–378.
